# Supplementary material for: Low 25-hydroxyvitamin D2 and 25-hydroxyvitamin D3 levels are independently associated with macroalbuminuria, but not with retinopathy and macrovascular disease in type 1 diabetes: the EURODIAB prospective complications study
Source: PubMed Central journal article supplement (PMC4456046; doi:10.1186/s12933-015-0231-2), 2015-05-30
Supplement: 12933_2015_231_MOESM1_ESM.pdf [file 12933_2015_231_MOESM1_ESM.pdf]

**Low 25-hydroxyvitamin D<sub>2</sub> and 25-hydroxyvitamin D<sub>3</sub> levels are independently associated with macroalbuminuria, but not with retinopathy and macrovascular disease in type 1 diabetes: the EURODIAB Prospective Complications Study**

Lian Engelen, Casper G. Schalkwijk, Simone J.P.M. Eussen, Jean L.J.M. Scheijen, Sabita S. Soedamah-Muthu, Nish Chaturvedi, John H. Fuller and Coen D.A. Stehouwer

-Electronic Supplementary Material -

Additional file 1: Figure S1 Concentration of 25(OH)D<sub>2</sub> (A) and 25(OH)D<sub>3</sub> (B) according to latitude of the study centre. City, country code and, between brackets, latitude of the study centre, and the number of individuals per study centre are displayed on the x-axis. Boxes indicate medians and interquartile ranges and whiskers represent the minimum and maximum values.

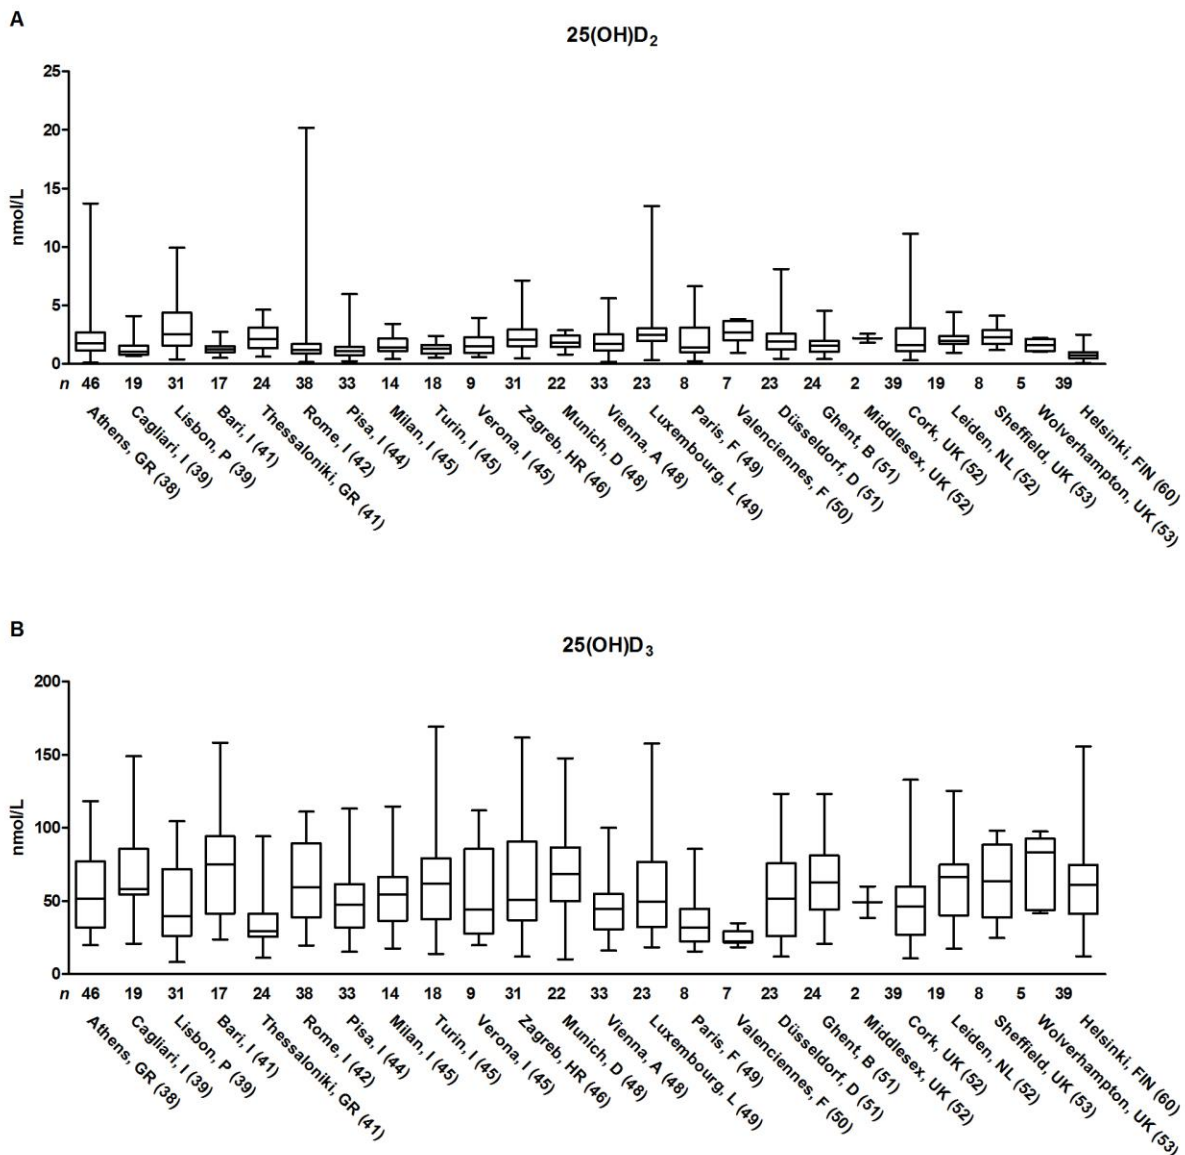

Figure S1

Table S1: Associations between 25-hydroxyvitamin D<sub>2</sub> tertiles and prevalent albuminuria, retinopathy and cardiovascular disease

|                                       | Model | 25-hydroxyvitamin D <sub>2</sub> tertiles |      |            |      |            | <i>p-trend</i> |  |
|---------------------------------------|-------|-------------------------------------------|------|------------|------|------------|----------------|--|
|                                       |       | T1                                        |      | T2         |      | T3         |                |  |
|                                       |       | OR                                        | OR   | 95% CI     | OR   | 95% CI     |                |  |
| Microalbuminuria (n=83)               | 1     | 1.0 (reference)                           | 0.87 | 0.47; 1.61 | 0.74 | 0.40; 1.37 | 0.34           |  |
|                                       | 2     | 1.0 (reference)                           | 0.86 | 0.41; 1.80 | 0.53 | 0.25; 1.12 | 0.09           |  |
|                                       | 3     | 1.0 (reference)                           | 0.92 | 0.44; 1.94 | 0.55 | 0.26; 1.17 | 0.10           |  |
|                                       | 4     | 1.0 (reference)                           | 0.94 | 0.44; 2.00 | 0.54 | 0.25; 1.15 | 0.09           |  |
| Macroalbuminuria (n=124)              | 1     | 1.0 (reference)                           | 0.29 | 0.18; 0.49 | 0.12 | 0.07; 0.23 | <0.001         |  |
|                                       | 2     | 1.0 (reference)                           | 0.39 | 0.19; 0.80 | 0.13 | 0.06; 0.30 | <0.001         |  |
|                                       | 3     | 1.0 (reference)                           | 0.41 | 0.20; 0.86 | 0.14 | 0.06; 0.31 | <0.001         |  |
|                                       | 4     | 1.0 (reference)                           | 0.42 | 0.20; 0.86 | 0.13 | 0.06; 0.30 | <0.001         |  |
| Non-proliferative retinopathy (n=146) | 1     | 1.0 (reference)                           | 0.67 | 0.39; 1.13 | 0.60 | 0.35; 1.02 | 0.07           |  |
|                                       | 2     | 1.0 (reference)                           | 0.70 | 0.35; 1.39 | 0.95 | 0.48; 1.89 | 0.95           |  |
| Proliferative retinopathy (n=152)     | 1     | 1.0 (reference)                           | 0.46 | 0.27; 0.77 | 0.51 | 0.31; 0.85 | 0.009          |  |
|                                       | 2     | 1.0 (reference)                           | 0.73 | 0.34; 1.55 | 1.60 | 0.76; 3.37 | 0.16           |  |
| CVD (n=131)                           | 1     | 1.0 (reference)                           | 1.88 | 1.11; 3.20 | 1.45 | 0.85; 2.49 | 0.18           |  |
|                                       | 2     | 1.0 (reference)                           | 2.22 | 1.23; 4.01 | 1.64 | 0.89; 3.05 | 0.13           |  |

OR, odds ratio indicates the odds of prevalent albuminuria, retinopathy and CVD, for 25-hydroxyvitamin D<sub>2</sub> tertile (T) 2 and T3 vs. T1. Model 1: adjusted for age and sex; Model 2: model 1 + BMI, smoking (never, ex, current), HbA<sub>1c</sub>, total-HDL-cholesterol-ratio, systolic blood pressure, use of antihypertensive medication, eGFR, physical activity (0, ≤sex-specific median, >sex-specific median), alcohol intake (0, ≤70 g/wk, >70 g/wk), and prevalent CVD, albuminuria and retinopathy, as appropriate; Model 3: model 2 + low-grade inflammation score; Model 4: model 2 + endothelial dysfunction score.

Table S2: Associations between 25-hydroxyvitamin D<sub>3</sub> tertiles and prevalent albuminuria, retinopathy and CVD

|                                       | Model | month-specific 25-hydroxyvitamin D <sub>3</sub> tertiles |             |      |            |      |            | <i>p-trend</i> |
|---------------------------------------|-------|----------------------------------------------------------|-------------|------|------------|------|------------|----------------|
|                                       |       | T1                                                       |             | T2   |            | T3   |            |                |
|                                       |       | OR                                                       |             | OR   | 95% CI     | OR   | 95% CI     |                |
| Microalbuminuria (n=83)               | 1     | 1.0                                                      | (reference) | 1.26 | 0.91; 1.71 | 0.65 | 0.35; 1.22 | 0.16           |
|                                       | 2     | 1.0                                                      | (reference) | 1.81 | 0.89; 3.69 | 0.80 | 0.38; 1.72 | 0.56           |
|                                       | 3     | 1.0                                                      | (reference) | 2.02 | 0.97; 4.18 | 0.88 | 0.41; 1.91 | 0.73           |
|                                       | 4     | 1.0                                                      | (reference) | 1.80 | 0.88; 3.67 | 0.81 | 0.38; 1.75 | 0.60           |
| Macroalbuminuria (n=124)              | 1     | 1.0                                                      | (reference) | 0.61 | 0.47; 0.79 | 0.29 | 0.17; 0.51 | <0.001         |
|                                       | 2     | 1.0                                                      | (reference) | 0.97 | 0.48; 1.94 | 0.32 | 0.14; 0.69 | 0.005          |
|                                       | 3     | 1.0                                                      | (reference) | 1.06 | 0.52; 2.16 | 0.34 | 0.15; 0.75 | 0.008          |
|                                       | 4     | 1.0                                                      | (reference) | 0.97 | 0.48; 1.94 | 0.32 | 0.15; 0.72 | 0.006          |
| Non-proliferative retinopathy (n=146) | 1     | 1.0                                                      | (reference) | 0.69 | 0.41; 1.17 | 0.43 | 0.25; 0.74 | 0.002          |
|                                       | 2     | 1.0                                                      | (reference) | 0.77 | 0.40; 1.49 | 0.71 | 0.36; 1.39 | 0.32           |
| Proliferative retinopathy (n=152)     | 1     | 1.0                                                      | (reference) | 0.70 | 0.42; 1.17 | 0.50 | 0.30; 0.84 | 0.008          |
|                                       | 2     | 1.0                                                      | (reference) | 0.93 | 0.45; 1.91 | 0.95 | 0.46; 1.98 | 0.91           |
| CVD (n=131)                           | 1     | 1.0                                                      | (reference) | 1.07 | 0.65; 1.77 | 0.77 | 0.46; 1.31 | 0.36           |
|                                       | 2     | 1.0                                                      | (reference) | 1.23 | 0.71; 2.12 | 0.94 | 0.52; 1.70 | 0.86           |

OR, odds ratio indicates the odds of prevalent albuminuria, retinopathy and CVD for month-specific 25-hydroxyvitamin D<sub>3</sub> tertile (T) 2 and T3 vs. T1. Model 1: adjusted for age and sex; Model 2: model 1 + BMI, smoking (never, ex, current), HbA<sub>1c</sub>, total-HDL-cholesterol-ratio, systolic blood pressure, use of antihypertensive medication, eGFR, physical activity (0, ≤sex-specific median, >sex-specific median), alcohol intake (0, ≤70 g/wk, >70 g/wk), and prevalent albuminuria, retinopathy and CVD, as appropriate; Model 3: model 2 + low-grade inflammation score; Model 4: model 2 + endothelial dysfunction score.

Table S3: Associations between 25-hydroxyvitamin D<sub>2</sub> levels and markers of low-grade inflammation and endothelial dysfunction

|             | Model | 25-hydroxyvitamin D <sub>2</sub> per 1 nmol/L |                |        | 25-hydroxyvitamin D <sub>2</sub> tertiles |        |                |        |                |        |         |
|-------------|-------|-----------------------------------------------|----------------|--------|-------------------------------------------|--------|----------------|--------|----------------|--------|---------|
|             |       | β                                             | 95% CI         | p      | T1                                        |        | T2             |        | T3             |        | p-trend |
|             |       |                                               |                |        | β                                         | β      | 95% CI         | β      | 95% CI         |        |         |
| LGI score   | 1     | -0.050                                        | -0.094; -0.006 | 0.027  | 0.0 (reference)                           | -0.307 | -0.500; -0.115 | -0.325 | -0.517; -0.132 | 0.001  |         |
|             | 2     | -0.026                                        | -0.068; 0.015  | 0.22   | 0.0 (reference)                           | -0.239 | -0.420; -0.058 | -0.190 | -0.371; -0.009 | 0.042  |         |
| Ln(CRP)     | 1     | -0.015                                        | -0.061; 0.031  | 0.52   | 0.0 (reference)                           | -0.056 | -0.256; 0.144  | -0.066 | -0.266; 0.134  | 0.52   |         |
|             | 2     | -0.005                                        | -0.049; 0.039  | 0.82   | 0.0 (reference)                           | -0.078 | -0.270; 0.114  | -0.028 | -0.221; 0.164  | 0.78   |         |
| Ln(IL-6)    | 1     | -0.013                                        | -0.059; 0.034  | 0.60   | 0.0 (reference)                           | -0.211 | -0.416; -0.005 | -0.151 | -0.355; 0.052  | 0.15   |         |
|             | 2     | -0.004                                        | -0.051; 0.043  | 0.87   | 0.0 (reference)                           | -0.181 | -0.386; 0.025  | -0.093 | -0.298; 0.112  | 0.38   |         |
| Ln(TNF-α)   | 1     | -0.081                                        | -0.125; -0.038 | <0.001 | 0.0 (reference)                           | -0.405 | -0.594; -0.216 | -0.493 | -0.683; -0.303 | <0.001 |         |
|             | 2     | -0.049                                        | -0.087; -0.010 | 0.013  | 0.0 (reference)                           | -0.264 | -0.432; -0.097 | -0.294 | -0.465; -0.124 | 0.001  |         |
| ED score    | 1     | -0.036                                        | -0.082; 0.011  | 0.13   | 0.0 (reference)                           | -0.456 | -0.658; -0.254 | -0.355 | -0.553; -0.156 | 0.001  |         |
|             | 2     | -0.016                                        | -0.061; 0.028  | 0.48   | 0.0 (reference)                           | -0.363 | -0.557; -0.170 | -0.234 | -0.426; -0.043 | 0.019  |         |
| sE-selectin | 1     | 0.012                                         | -0.035; 0.058  | 0.62   | 0.0 (reference)                           | -0.262 | -0.467; -0.058 | -0.066 | -0.269; 0.136  | 0.53   |         |
|             | 2     | 0.009                                         | -0.038; 0.055  | 0.72   | 0.0 (reference)                           | -0.249 | -0.450; -0.048 | -0.060 | -0.260; 0.140  | 0.58   |         |
| sVCAM-1     | 1     | -0.064                                        | -0.111; -0.017 | 0.008  | 0.0 (reference)                           | -0.397 | -0.601; -0.193 | -0.446 | -0.648; -0.244 | <0.001 |         |
|             | 2     | -0.032                                        | -0.076; 0.012  | 0.16   | 0.0 (reference)                           | -0.276 | -0.467; -0.084 | -0.279 | -0.469; -0.088 | 0.004  |         |

β, regression coefficient indicates the increase in markers of inflammation and endothelial dysfunction (in SD) per 1 nmol/L higher 25-hydroxyvitamin D<sub>2</sub> (first column) or 25-hydroxyvitamin D<sub>2</sub> tertile (T) 2 and T3 vs. T1 (last three columns). Model 1: adjusted for age, sex and case-control status; Model 2: model 1 + BMI, smoking (never, ex, current), HbA<sub>1c</sub>, total-HDL-cholesterol-ratio, systolic blood pressure, use of antihypertensive medication, eGFR, physical activity (0, ≤sex-specific median, >sex-specific median), alcohol intake (0, ≤70 g/wk, >70 g/wk). *LGI*, low-grade inflammation; *ED*, endothelial dysfunction.

Table S4: Associations between 25-hydroxyvitamin D<sub>3</sub> levels and markers of inflammation and endothelial dysfunction

|                    | Model | 25-hydroxyvitamin D <sub>3</sub> per 10 nmol/L |                |          | month-specific 25-hydroxyvitamin D <sub>3</sub> tertiles |         |                |         |                |                |
|--------------------|-------|------------------------------------------------|----------------|----------|----------------------------------------------------------|---------|----------------|---------|----------------|----------------|
|                    |       | $\beta$                                        | 95% CI         | <i>p</i> | T1                                                       | T2      |                | T3      |                | <i>p-trend</i> |
|                    |       |                                                |                |          | $\beta$                                                  | $\beta$ | 95% CI         | $\beta$ | 95% CI         |                |
| LGI score          | 1     | -0.034                                         | -0.066; -0.003 | 0.032    | 0.0 (reference)                                          | -0.287  | -0.480; -0.093 | -0.215  | -0.410; -0.020 | 0.031          |
|                    | 2     | -0.019                                         | -0.049; 0.011  | 0.21     | 0.0 (reference)                                          | -0.206  | -0.387; -0.024 | -0.131  | -0.317; 0.056  | 0.17           |
| Ln(CRP)            | 1     | -0.016                                         | -0.048; 0.017  | 0.35     | 0.0 (reference)                                          | -0.202  | -0.402; -0.002 | -0.122  | -0.325; 0.081  | 0.24           |
|                    | 2     | -0.010                                         | -0.041; 0.022  | 0.55     | 0.0 (reference)                                          | -0.165  | -0.357; 0.026  | -0.091  | -0.288; 0.107  | 0.37           |
| Ln(IL-6)           | 1     | -0.029                                         | -0.063; 0.004  | 0.09     | 0.0 (reference)                                          | -0.275  | -0.480; -0.070 | -0.249  | -0.456; -0.042 | 0.018          |
|                    | 2     | -0.017                                         | -0.051; 0.018  | 0.35     | 0.0 (reference)                                          | -0.219  | -0.426; -0.012 | -0.175  | -0.388; 0.037  | 0.10           |
| Ln(TNF- $\alpha$ ) | 1     | -0.030                                         | -0.066; 0.002  | 0.07     | 0.0 (reference)                                          | -0.151  | -0.345; 0.044  | -0.098  | -0.294; 0.098  | 0.33           |
|                    | 2     | -0.016                                         | -0.045; 0.013  | 0.29     | 0.0 (reference)                                          | -0.066  | -0.238; 0.106  | -0.020  | -0.197; 0.157  | 0.83           |
| ED score           | 1     | -0.048                                         | -0.082; -0.015 | 0.005    | 0.0 (reference)                                          | -0.205  | -0.407; -0.002 | -0.272  | -0.478; -0.066 | 0.010          |
|                    | 2     | -0.040                                         | -0.073; -0.007 | 0.017    | 0.0 (reference)                                          | -0.149  | -0.343; 0.046  | -0.215  | -0.416; -0.015 | 0.035          |
| sE-selectin        | 1     | -0.022                                         | -0.056; 0.012  | 0.20     | 0.0 (reference)                                          | -0.037  | -0.242; 0.168  | -0.155  | -0.363; 0.053  | 0.14           |
|                    | 2     | -0.020                                         | -0.054; 0.014  | 0.24     | 0.0 (reference)                                          | -0.002  | -0.203; 0.200  | -0.128  | -0.336; 0.080  | 0.23           |
| sVCAM-1            | 1     | -0.048                                         | -0.082; -0.014 | 0.006    | 0.0 (reference)                                          | -0.258  | -0.463; -0.053 | -0.238  | -0.446; -0.029 | 0.025          |
|                    | 2     | -0.037                                         | -0.069; -0.005 | 0.024    | 0.0 (reference)                                          | -0.213  | -0.404; -0.021 | -0.183  | -0.381; 0.015  | 0.07           |

$\beta$ , regression coefficient indicates the increase in markers of inflammation and endothelial dysfunction (in SD) per 10 nmol/L higher 25-hydroxyvitamin D<sub>3</sub> (first column) or month-specific 25-hydroxyvitamin D<sub>3</sub> tertile (T) 2 and T3 vs. T1 (last three columns). Model 1: adjusted for age, sex and case-control status (and, in the analyses with continuous 25-hydroxyvitamin D<sub>3</sub> levels, season); Model 2: model 1 + BMI, smoking (never, ex, current), HbA<sub>1c</sub>, total-HDL-cholesterol-ratio, systolic blood pressure, use of antihypertensive medication, eGFR, physical activity (0,  $\leq$ sex-specific median,  $>$ sex-specific median), alcohol intake (0,  $\leq$ 70 g/wk,  $>$ 70 g/wk).

## **The EURODIAB Prospective Complications Study Group**

B. Karamanos, A. Kofinis, K. Petrou, Hippokration Hospital, Athens, Greece; F. Giorgino, G. Picca, A. Angarano, G. De Pergola, L. Laviola, R. Giorgino, Internal Medicine, Endocrinology and Metabolic Diseases, Department of Emergency and Organ Transplantation, University of Bari, Bari, Italy; C. Ionescu-Tirgoviste, A. Coszma, C. Guja, Clinic of Diabetes, Nutrition and Metabolic Diseases, Bucharest, Romania; M. Songini, A. Casu, M. Pedron, S. Pintus, M. Fossarello, Diabetes Unit Ospedale San Michele, Cagliari, Italy; J. B. Ferriss, G. Greal, D. O'Keefe, Cork University Hospital, Cork, Ireland; M. Toeller, C. Arden, Diabetes Research Institute, Heinrich-Heine University, Duesseldorf, Germany; R. Rottiers, C. Tuytens, H. Priem, University Hospital of Gent, Belgium; P. Ebeling, M. Kylliäinen, V. A. Koivisto, University Hospital of Helsinki, Finland; B. Idzior-Walus, J. Sieradzki, K. Cyganek, B. Solnica, Department of Metabolic Diseases, Jagiellonian University, Krakow, Poland; H. H. P. J. Lemkes, J. C. Lemkes-Stuffken, Leiden University Medical Centre, the Netherlands; J. Nunes-Correa, M. C. Rogado, L. Gardete-Correia, M. C. Cardoso, A. Silva, J. Boavida, M. Machado Sa Marques, Portuguese Diabetic Association, Lisbon, Portugal; G. Michel, R. Wirion, S. Cardillo, Centre Hospitalier, Luxembourg; G. Pozza, R. Mangili, V. Asnagli, Ospedale San Raffaele, Milan, Italy; E. Standl, B. Schaffler, H. Brand, A. Harms, City Hospital Schwabing, Munich, Germany; D. Ben Soussan, O. Verier-Mine, P. Fallas, M. C. Fallas, Centre Hospitalier de Valenciennes, France; J. H. Fuller, J. Holloway, L. Asbury, D. J. Betteridge, University College London, UK; G. Cathelineau, A. Bouallouche, B. Villatte Cathelineau, Hospital Saint-Louis, Paris, France; F. Santeusano, G. Rosi, V. D'Alessandro, C. Cagini, P. Bottini, G. P. Reboldi, Dipartimento di Medicina Interna, Perugia, Italy; R. Navalesi, G. Penno, S. Bandinelli, R. Miccoli, M. Nannipieri, Dipartimento di Endocrinologia e Metabolismo, Pisa, Italy; G. Ghirlanda, C. Saponara, P. Cotroneo, A. Manto, A. Minnella, Università Cattolica del Sacro Cuore, Rome, Italy; J. D. Ward, S. Tesfaye, S. Eaton, C. Mody, Royal Hallamshire Hospital, Sheffield, UK; M. Borra, P. Cavallo Perin, S. Giunti, G. Grassi, G. F. Pagano, M. Porta, R. Sivieri, F. Vitelli, M. Veglio, Dipartimento di Medicina Interna, Università di Torino and ASO TO/CRF/Maria Adelaide, Turin, Italy; N. Papazoglou, G. Manes, General Hospital Papageorgiou, Diabetes

Unit, Thessaloniki, Greece; M. Muggeo, M. Iagulli, V. Cacciatori, V. Cattedra di Malattie del Metabolismo, Verona, Italy; K. Irsigler, H. Abrahamian, Hospital Vienna Lainz, Austria; S. Walford, J. Sinclair, S. Hughes, V. McLelland, J. Ward, New Cross Hospital, Wolverhampton, UK; G. Roglic, Z. Metelko, Z. R. Pepeonik, Vuk Vrhovac Institute for Diabetes, Zagreb, Croatia

*Steering committee members*

J. H. Fuller (London), B. Karamanos, Chairman (Athens), A.-K. Sjolie (Odense), N. Chaturvedi (London), M. Toeller (Duesseldorf), G. Pozza Co-chairman (Milan), B. Ferriss (Cork), M. Porta (Turin), R. Rottiers (Gent), G. Michel (Luxembourg)

*Co-ordinating centre*

J. H. Fuller, N. Chaturvedi, J. Holloway, D. Webb, L. Asbury, University College London, UK

*Central laboratories*

G.-C. Viberti, R. Swaminathan, P. Lumb, A. Collins, S. Sankaralingham, M.A. Crook, Guy's and St Thomas Hospital, London, UK

*Retinopathy Grading Centre*

S. Aldington, T. Mortemore, H. Lipinski, Royal Postgraduate Medical School of Imperial College London, London, UK

*Nutrition Co-ordinating Centre*

M. Toeller, W.A. Scherbaum, F.A. Gries, Heinrich-Heine-University, Diabetes Research Institute and Department of Endocrinology, Diabetology and Rheumatology, Duesseldorf, Germany
